# Supplementary material for: La Pastoral Penitenciaria en España
Source: Frontiers journal article supplement (doi:10.3389/fimmu.2022.895869), 2001-01-01

Supplementary Figure 3      KEGG pathway diagram of IL-17 signaling pathway

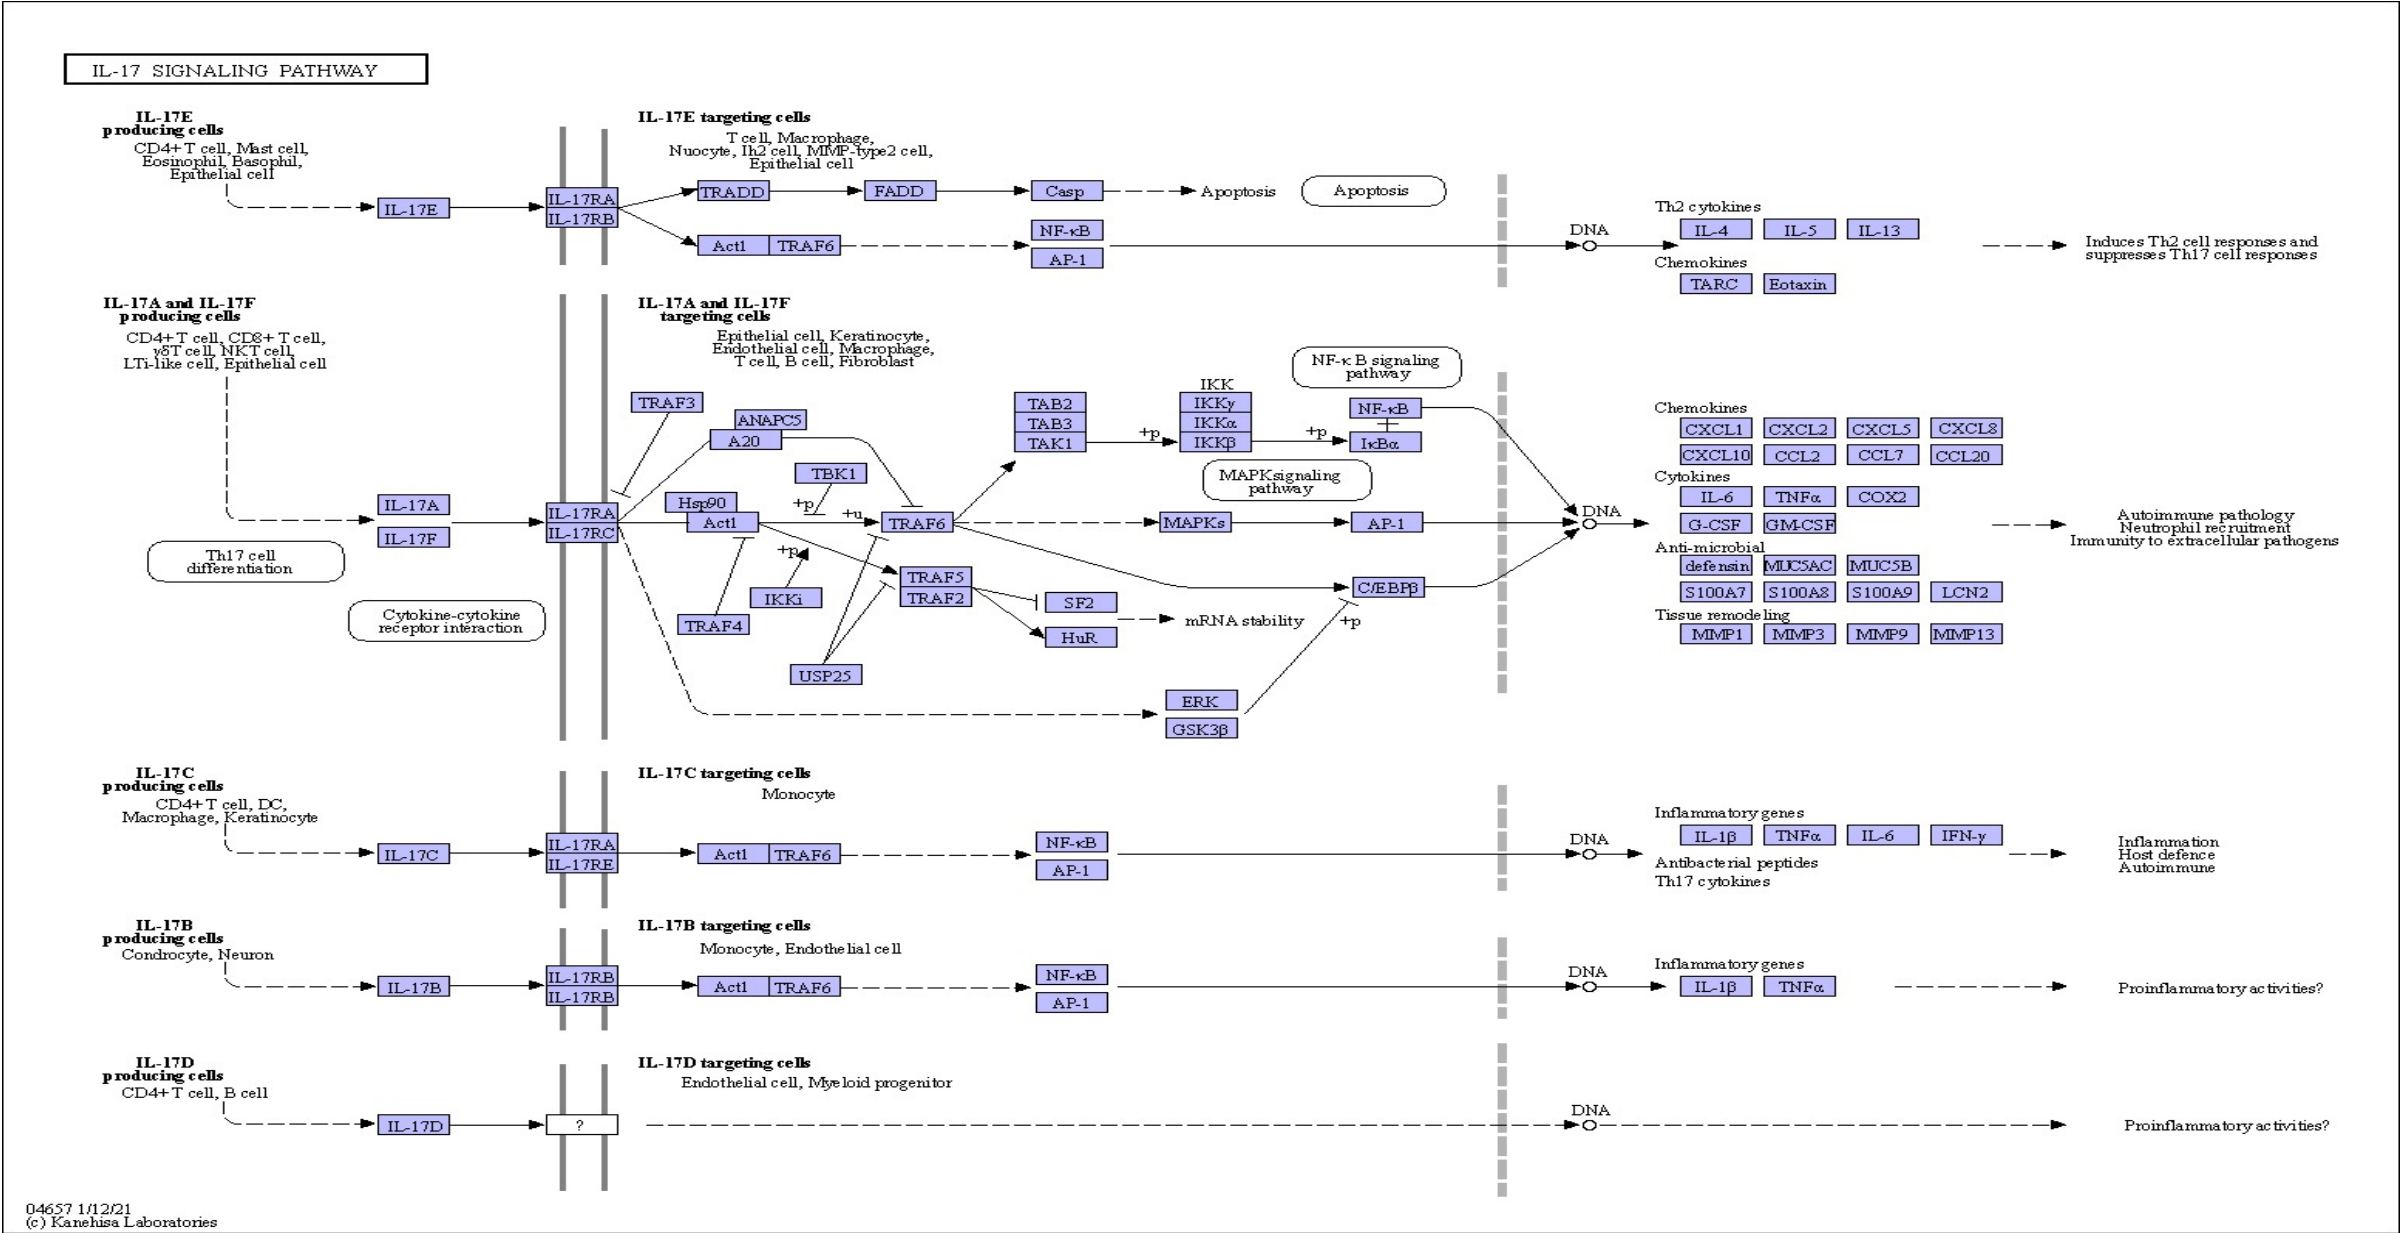

Supplement: Image_3.pdf [file Image_3.pdf]
