# Supplementary material for: Candidate Drugs Screening for Behcet’s Disease Based on Bioinformatics Analysis and Mouse Experiments
Source: Front Immunol. 2022 Jun 21;13:895869. doi: 10.3389/fimmu.2022.895869 (PMC9253297; doi:10.3389/fimmu.2022.895869)
Supplement: Supplementary file 5 [file Table_1.xlsx]

## Sheet: Annotation
Gene Symbol	protein name	Gene ID	Is it from the Uveogene database
IL23R	Interleukin-23 receptor	149233	Yes
IL12RB2	Interleukin-12 receptor subunit beta-2	3595	Yes
CXCL12	Stromal cell-derived factor 1	6387	Yes
TLR4	Toll-like receptor 4	7099	Yes
CCR1	C-C chemokine receptor type 1	1230	Yes
KLRC1	NKG2-A/NKG2-B type II integral membrane protein	3821	Yes
KLRD1	Natural killer cells antigen CD94	3824	Yes
IL4	Interleukin-4	3565	Yes
ERAP1	Endoplasmic reticulum aminopeptidase 1	51752	Yes
IL18R1	Interleukin-18 receptor 1	8809	Yes
CCL2	C-C motif chemokine 2	6347	Yes
RAB23	Ras-related protein Rab-23	51715	Yes
HSPA1A	Heat shock 70 kDa protein 1A	3303	Yes
CFB	Complement factor B	629	Yes
CYP1A1	Cytochrome P450 1A1	1543	Yes
TNFAIP3	Tumor necrosis factor alpha-induced protein 3	7128	Yes
FCGR3B	Low affinity immunoglobulin gamma Fc region receptor III-B	2215	Yes
CFH	Complement factor H	3075	Yes
VDR	Vitamin D3 receptor	7421	Yes
ETS1	Protein C-ets-1	2113	Yes
IRF5	Interferon regulatory factor 5	3663	Yes
UBAC2	Ubiquitin-associated domain-containing protein 2	337867	Yes
IRF8	Interferon regulatory factor 8	3394	Yes
ROCK1	Rho-associated protein kinase 1	6093	Yes
CPLX1	Complexin-1	10815	Yes
FCRL3	Fc receptor-like protein 3	115352	Yes
MICA	MHC class I polypeptide-related sequence A	100507436	Yes
HLA-DRB5	HLA class II histocompatibility antigen, DR beta 5 chain	3127	Yes
HLA-DRA	HLA class II histocompatibility antigen, DR alpha chain	3122	Yes
IL1B	Interleukin-1 beta	3553	Yes
HLA-B	HLA class I histocompatibility antigen, B alpha chain	3106	Yes
HLA-DQA2	HLA class II histocompatibility antigen, DQ alpha 2 chain	3118	Yes
HLA-DRB3	HLA class II histocompatibility antigen, DR beta 3 chain	3125	Yes
C1orf141	Uncharacterized protein C1orf141	400757	Yes
IL33	Interleukin-33	90865	Yes
INAVA	Innate immunity activator protein	55765	Yes
PSORS1C1	Psoriasis susceptibility 1 candidate gene 1 protein	170679	Yes
TRAF5	TNF receptor-associated factor 5	7188	Yes
DHCR7	7-dehydrocholesterol reductase	1717	Yes
CIITA	MHC class II transactivator	4261	Yes
CCR3	C-C chemokine receptor type 3	1232	Yes
TRAF3IP2	E3 ubiquitin ligase TRAF3IP2	10758	Yes
NRG1	Pro-neuregulin-1	3084	Yes
TECPR2	Tectonin beta-propeller repeat-containing protein 2	9895	Yes
ROCK2	Rho-associated protein kinase 2	9475	Yes
IL10	Interleukin-10	3586	Yes
GIMAP4	GTPase IMAP family member 4	55303	Yes
IL27	Interleukin-27 subunit alpha	246778	Yes
P2RX7	P2X purinoceptor 7	5027	Yes
TFCP2L1	Transcription factor CP2-like protein 1	29842	Yes
IL19	Interleukin-19	29949	Yes
MMP9	Matrix metalloproteinase-9	4318	Yes
PDGFRL	Platelet-derived growth factor receptor-like protein	5157	Yes
IL12A	Interleukin-12 subunit alpha	3592	Yes
TNF	Tumor necrosis factor	7124	Yes
NOS3	Nanos homolog 3	4846	Yes
TGFB1	Transforming growth factor beta-1 proprotein	7040	Yes
IL1A	Interleukin-1 alpha	3552	Yes
TNFRSF1A	Tumor necrosis factor receptor superfamily member 1A	7132	Yes
IL13	Interleukin-13	3596	Yes
MTHFR	Methylenetetrahydrofolate reductase	4524	Yes
IL4R	Interleukin-4 receptor subunit alpha	3566	Yes
IL18	Interleukin-18	3606	Yes
VEGF	Vascular endothelial growth factor A	7422	Yes
ZNF154	Zinc finger protein 154	7710	Yes
IL18RAP	Interleukin-18 receptor accessory protein	8807	Yes
CCDC180	Coiled-coil domain-containing protein 180	100499483	Yes
NOD2	Nucleotide-binding oligomerization domain-containing protein 2	64127	Yes
IL2	Interleukin-2	3558	Yes
CCHCR1	Coiled-coil alpha-helical rod protein 1	54535	Yes
TRIM39	E3 ubiquitin-protein ligase TRIM39	56658	Yes
RPP21	Ribonuclease P protein subunit p21	79897	Yes
NOD1	Nucleotide-binding oligomerization domain-containing protein 1	10392	Yes
MIF	Macrophage migration inhibitory factor	4282	Yes
IL2RA	Interleukin-2 receptor subunit alpha	3559	Yes
PDCD1	Programmed cell death protein 1	5133	Yes
ITGAX	Integrin alpha-X	3687	Yes
C6orf15	Uncharacterized protein C6orf15	29113	Yes
CCL17	C-C motif chemokine 17	6361	Yes
ADO	2-aminoethanethiol dioxygenase	84890	Yes
ZNF365	Talanin	22891	Yes
EGR2	E3 SUMO-protein ligase EGR2	1959	Yes
C5	Complement C5	727	Yes
TIMP2	Metalloproteinase inhibitor 2	7077	Yes
MMP2	72 kDa type IV collagenase	4313	Yes
UTS2	Urotensin-2	10911	Yes
TLR2	Toll-like receptor 2	7097	Yes
FOXO1	Forkhead box protein O1	2308	Yes
CEP43	Centrosomal protein 43	11116	Yes
CTLA4	Cytotoxic T-lymphocyte protein 4	1493	Yes
ITGB2	Integrin beta-2	3689	Yes
SUMO4	Small ubiquitin-related modifier 4	387082	Yes
IL17F	Interleukin-17F	112744	Yes
TLR8	Toll-like receptor 8	51311	Yes
PTPN22	Tyrosine-protein phosphatase non-receptor type 22	26191	Yes
JAK1	Tyrosine-protein kinase JAK1	3716	Yes
SUSD1	Sushi domain-containing protein 1	64420	Yes
NFKB1	Nuclear factor NF-kappa-B p105 subunit	4790	Yes
CXCL10	C-X-C motif chemokine 10	3627	Yes
GPR25	Probable G-protein coupled receptor 25	2848	Yes
KIF21B	Kinesin-like protein KIF21B	23046	Yes
HLA-DRB1	HLA class II histocompatibility antigen, DRB1 beta chain	3123	Yes
HLA-DQA1	HLA class II histocompatibility antigen, DQ alpha 1 chain	3117	Yes
PROZ	Vitamin K-dependent protein Z	8858	Yes
MICB	MHC class I polypeptide-related sequence B	4277	Yes
CPVL	Probable serine carboxypeptidase	54504	Yes
IL12B	Interleukin-12 subunit beta	3593	Yes
GPR35	G-protein coupled receptor 35	2859	Yes
FOXP3	Forkhead box protein P3	50943	Yes
TLR7	Toll-like receptor 7	51284	Yes
FCGR2A	Low affinity immunoglobulin gamma Fc region receptor II-a	2212	Yes
SLC22A3	Solute carrier family 22 member 3	6581	Yes
HLA-H	Putative HLA class I histocompatibility antigen, alpha chain H	3136	Yes
PROS1	Vitamin K-dependent protein S	5627	Yes
UBASH3B	Ubiquitin-associated and SH3 domain-containing protein B	84959	Yes
HCG22	Protein PBMUCL2	285834	Yes
ICAM1	Intercellular adhesion molecule 1	3383	Yes
ANXA11	Annexin A11	311	Yes
EYS	Protein eyes shut homolog	346007	Yes
IL6R	Interleukin-6 receptor subunit alpha	3570	Yes
UBLCP1	Ubiquitin-like domain-containing CTD phosphatase 1	134510	Yes
IFI16	Gamma-interferon-inducible protein 16	3428	Yes
HLA-DQB1	HLA class II histocompatibility antigen, DQ beta 1 chain	3119	Yes
STAT4	Signal transducer and activator of transcription 4	6775	Yes
ERAP2	Endoplasmic reticulum aminopeptidase 2	64167	Yes
LNPEP	Leucyl-cystinyl aminopeptidase	4012	Yes
IL17A	Interleukin-17A	3605	Yes
REL	Proto-oncogene c-Rel	5966	Yes
AIM2	Interferon-inducible protein AIM2	9447	Yes
LTA	Lymphotoxin-alpha	4049	Yes
CEBPB	CCAAT/enhancer-binding protein beta	1051	Yes
PTPN1	Tyrosine-protein phosphatase non-receptor type 1	5770	Yes
RNF39	RING finger protein 39	80352	Yes
GAS6	Growth arrest-specific protein 6	2621	Yes
IFNG	Interferon gamma	3458	Yes
HSPA14	Heat shock 70 kDa protein 14	51182	No
CD44	CD44 antigen	960	No
DBF4	Protein DBF4 homolog A	10926	No
PCLAF	PCNA-associated factor	9768	No
SOAT1	Sterol O-acyltransferase 1	6646	No
DEFA1	Neutrophil defensin 1	1667	No
IKBKG	NF-kappa-B essential modulator	8517	No
CD69	Early activation antigen CD69	969	No
TBX21	T-box transcription factor TBX21	30009	No
AHR	Aryl hydrocarbon receptor	196	No
IL22	Interleukin-22	50616	No
CCR10	C-C chemokine receptor type 10	2826	No
IL37	Interleukin-37	27178	No
MEFV	Pyrin	4210	No
KCNH6	Potassium voltage-gated channel subfamily H member 6	81033	No
KIR3DS1	Killer cell immunoglobulin-like receptor 3DS1	3813	No
KIR3DL1	Killer cell immunoglobulin-like receptor 3DL1	3811	No
CCR5	C-C chemokine receptor type 5	1234	No
TAB2	TGF-beta-activated kinase 1 and MAP3K7-binding protein 2	23118	No
NOTCH1	Neurogenic locus notch homolog protein 1	4851	No
BACH1	Fanconi anemia group J protein	571	No
Cd274	Programmed cell death 1 ligand 1	29126	No
PDCD1LG2	Programmed cell death 1 ligand 2	80380	No
CD52	CAMPATH-1 antigen	1043	No
CXCR3	C-X-C chemokine receptor type 3	2833	No
CD14	Monocyte differentiation antigen CD14	929	No
CSF3	Granulocyte colony-stimulating factor	1440	No
IL26	Interleukin-26	55801	No
CSF2	Granulocyte-macrophage colony-stimulating factor	1437	No
MS4A1	B-lymphocyte antigen CD20	931	No
ABCB1	ATP-dependent translocase ABCB1	5243	No
CLEC4E	C-type lectin domain family 4 member E	26253	No
CPLX2	Complexin-2	10814	No
GEM	GTP-binding protein GEM	2669	No
ACE	Angiotensin-converting enzyme	1636	No
IL20	Interleukin-20	50604	No
ICOS	Inducible T-cell costimulator	29851	No
MTCH1	Mitochondrial carrier homolog 1	23787	No
TNFSF13B	Tumor necrosis factor ligand superfamily member 13B	10673	No
HMGB1	High mobility group protein B1	3146	No
IL15	Interleukin-15	3600	No
TREM1	Triggering receptor expressed on myeloid cells 1	54210	No
CD40LG	CD40 ligand	959	No
SCUBE1	CUB and EGF-like domain-containing protein 1	80274	No
S100A8	Protein S100-A8	6279	No
S100A9	Protein S100-A9	6280	No
CXCL8	Interleukin-8	3576	No
IL32	Interleukin-32	9235	No
HCK	Tyrosine-protein kinase HCK	3055	No
SRC	Proto-oncogene tyrosine-protein kinase Src	6714	No
LYN	Tyrosine-protein kinase Lyn	4067	No
YES1	Tyrosine-protein kinase Yes	7525	No
FYN	Tyrosine-protein kinase Fyn	2534	No
IL1RL1	Interleukin-1 receptor-like 1	9173	No
TIRAP	Toll/interleukin-1 receptor domain-containing adapter protein	114609	No
VKORC1	Vitamin K epoxide reductase complex subunit 1	79001	No
PON1	Serum paraoxonase/arylesterase 1	5444	No
TPMT	Thiopurine S-methyltransferase	7172	No
GIMAP2	GTPase IMAP family member 2	26157	No
GIMAP1	GTPase IMAP family member 1	170575	No
CP	Ceruloplasmin	1356	No
HBB	Hemoglobin subunit beta	3043	No
IRAK1	Interleukin-1 receptor-associated kinase 1	3654	No
CXCL11	C-X-C motif chemokine 11	6373	No
SAA1	Serum amyloid A-1 protein	6288	No
PADI4	Protein-arginine deiminase type-4	23569	No
CD68	Macrosialin	968	No
WDR1	WD repeat-containing protein 1	9948	No
NCF1	Neutrophil cytosol factor 1	653361	No
AP1S3	AP-1 complex subunit sigma-3	130340	No
GLA	Alpha-galactosidase A	2717	No
STAT1	Signal transducer and activator of transcription 1-alpha/beta	6772	No
CXCL1	Growth-regulated alpha protein	2919	No
CCN2	CCN family member 2	1490	No
BAX	Apoptosis regulator BAX	581	No
COL5A1	Collagen alpha-1(V) chain	1289	No
TRPV3	Transient receptor potential cation channel subfamily V member 3	162514	No
ARHGEF10	Rho guanine nucleotide exchange factor 10	9639	No
PLA2G1B	Phospholipase A2	5319	No
CYP2C19	Cytochrome P450 2C19	1557	No
RORC	Nuclear receptor ROR-gamma	6097	No
ATG5	Autophagy protein 5	9474	No
CD83	CD83 antigen	9308	No
GDF15	Growth/differentiation factor 15	9518	No
HAVCR2	Hepatitis A virus cellular receptor 2	84868	No
RNASE3	Eosinophil cationic protein	6037	No
HSPB1	Heat shock protein beta-1	3315	No
CXCL16	C-X-C motif chemokine 16	58191	No
IAPP	Islet amyloid polypeptide	3375	No
ANXA2	Annexin A2	302	No
CCL3	C-C motif chemokine 3	6348	No
TNFSF4	Tumor necrosis factor ligand superfamily member 4	7292	No
GATA3	Trans-acting T-cell-specific transcription factor GATA-3	2625	No
EBI3	Interleukin-27 subunit beta	10148	No
CCL4	C-C motif chemokine 4	6351	No
OTULIN	Ubiquitin thioesterase otulin	90268	No
IL15RA	Interleukin-15 receptor subunit alpha	3601	No
PTPN2	Tyrosine-protein phosphatase non-receptor type 2	5771	No
TNFSF13	Tumor necrosis factor ligand superfamily member 13	8741	No
OLR1	Oxidized low-density lipoprotein receptor 1	4973	No
IL36RN	Interleukin-36 receptor antagonist protein	26525	No
DEFB1	Beta-defensin 1	1672	No
TNFRSF17	Tumor necrosis factor receptor superfamily member 17	608	No
IL1F10	Interleukin-1 family member 10	84639	No
TRIM21	E3 ubiquitin-protein ligase TRIM21	6737	No
IL23A	Interleukin-23 subunit alpha	51561	No
IL9	Interleukin-9	3578	No
FASN	Fatty acid synthase	2194	No
PANX1	Pannexin-1	24145	No
KLRK1	NKG2-D type II integral membrane protein	22914	No
ARR3	Arrestin-C	407	No
CX3CL1	Fractalkine	6376	No
TNFRSF8	Tumor necrosis factor receptor superfamily member 8	943	No
CCL20	C-C motif chemokine 20	6364	No
